# Supplementary material for: Multiplex acute leukemia cytosensing using multifunctional hybrid electrochemical nanoprobes at a hierarchically nanoarchitectured electrode interface
Source: Royal Society of Chemistry journal article supplement (doi:10.1039/c3nr02903d), 2013-01-01
Supplement: c3nr02903d.pdf [file c3nr02903d.pdf]

*Electronic Supplementary Information for*

**Multiplex Acute Leukemia Cytosensing Using  
Multifunctional Hybrid Electrochemical Nanoprobes at  
Hierarchically Nanoarchitected Electrode Interface**

**Tingting Zheng,<sup>a,b</sup> Tingting Tan,<sup>c</sup> Qingfeng Zhang,<sup>b</sup> Jia-Ju Fu,<sup>a</sup> Jia-Jun Wu,<sup>a</sup> Kui Zhang,<sup>c</sup>  
Jun-Jie Zhu,<sup>a,\*</sup> and Hui Wang<sup>b,\*</sup>**

<sup>a</sup> State Key Laboratory of Analytical Chemistry for Life Science, School of Chemistry and Chemical Engineering, Nanjing University, Nanjing, Jiangsu 210093, China

<sup>b</sup> Department of Chemistry and Biochemistry, University of South Carolina, 631 Sumter Street, Columbia, South Carolina 29208, United States

<sup>c</sup> Department of Medical Laboratory, The Affiliated Drum Tower Hospital of Nanjing University Medical School, Nanjing, Jiangsu 210008, China

\* Corresponding authors. Emails: [jjzhu@nju.edu.cn](mailto:jjzhu@nju.edu.cn) (J.-J. Zhu); [wang344@mailbox.sc.edu](mailto:wang344@mailbox.sc.edu) (H. Wang)

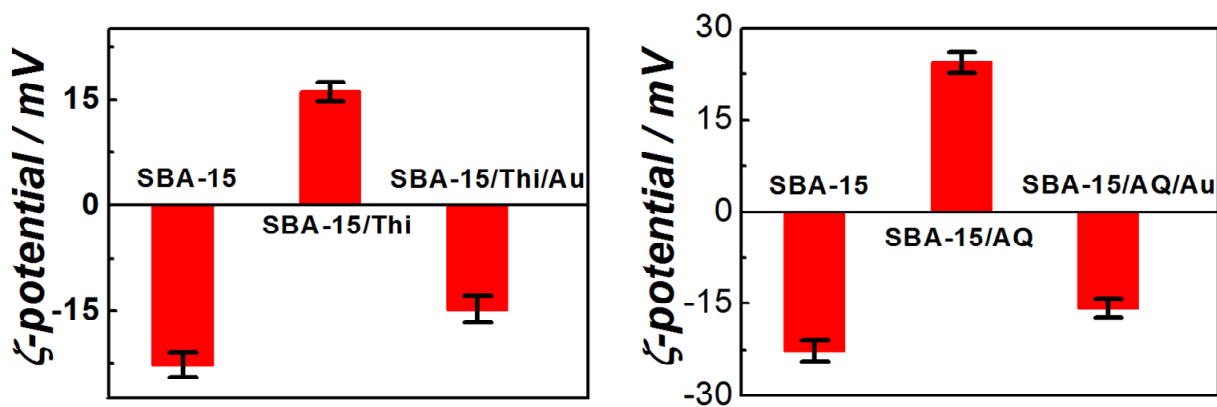

**Fig. S1** Evolution of  $\zeta$ -potentials during (*left panel*) the SBA-15/Thi/Au NPs and (*right panel*) SBA-15/AQ/Au NPs nanocomposite assembly processes.

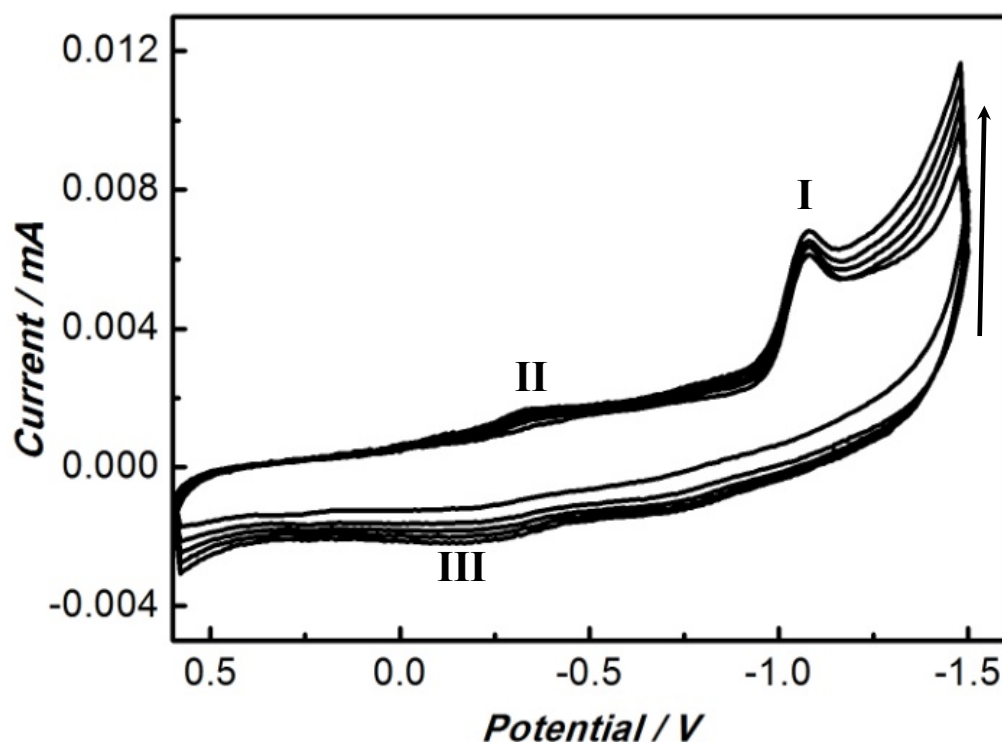

**Fig. S2** Cyclic voltammograms for the electrolysis of 1.0 mg mL<sup>-1</sup> GO in pH 9.0 carbonate buffer solution at a scan rate of 25 mV s<sup>-1</sup>.

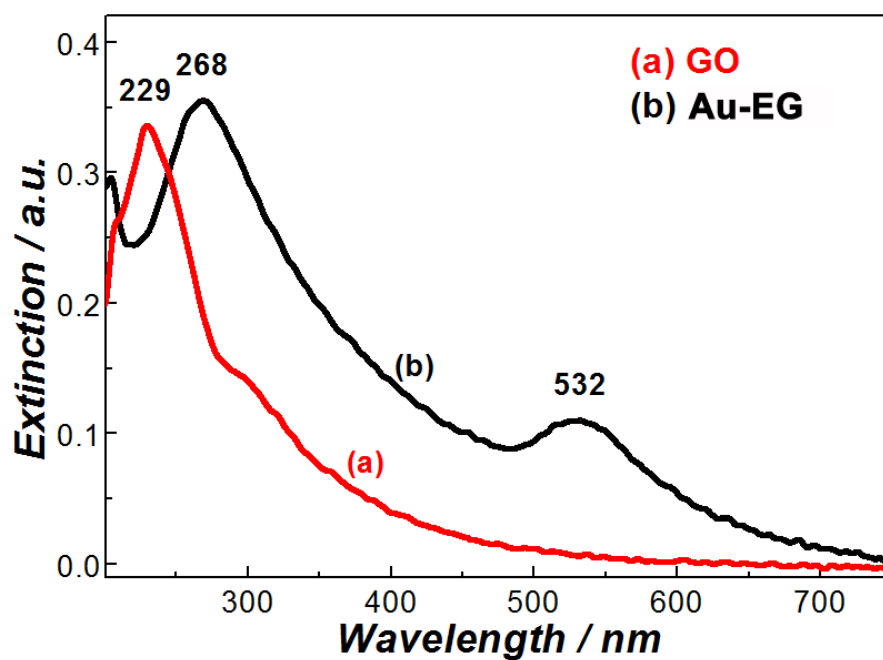

Fig. S3 UV-Vis extinction spectra of (a) GO and (b) Au-EG nanocomposite film.

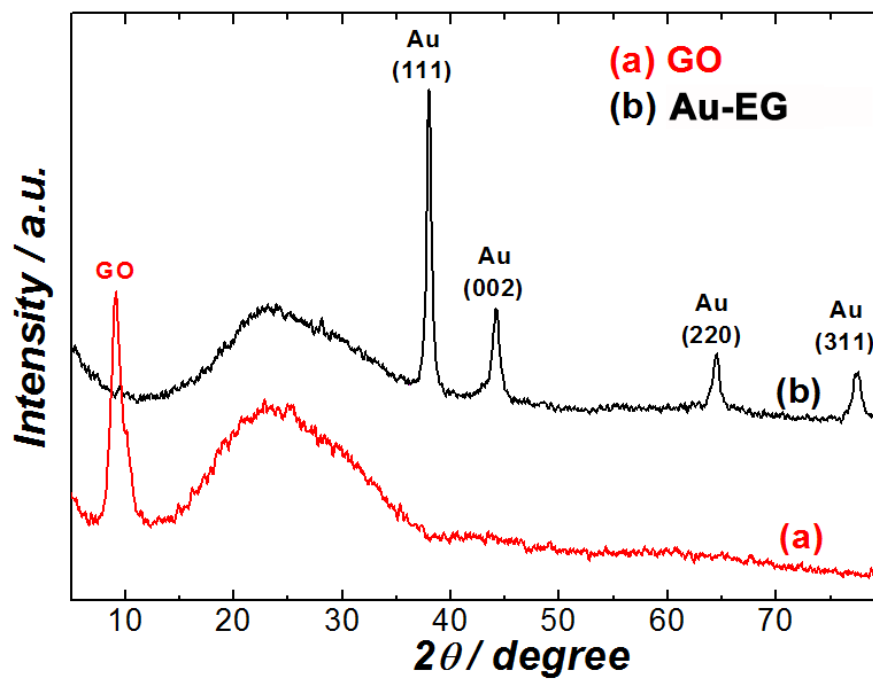

Fig. S4 Wide angle powder XRD patterns of (a) GO and (b) Au-EG nanocomposite film.

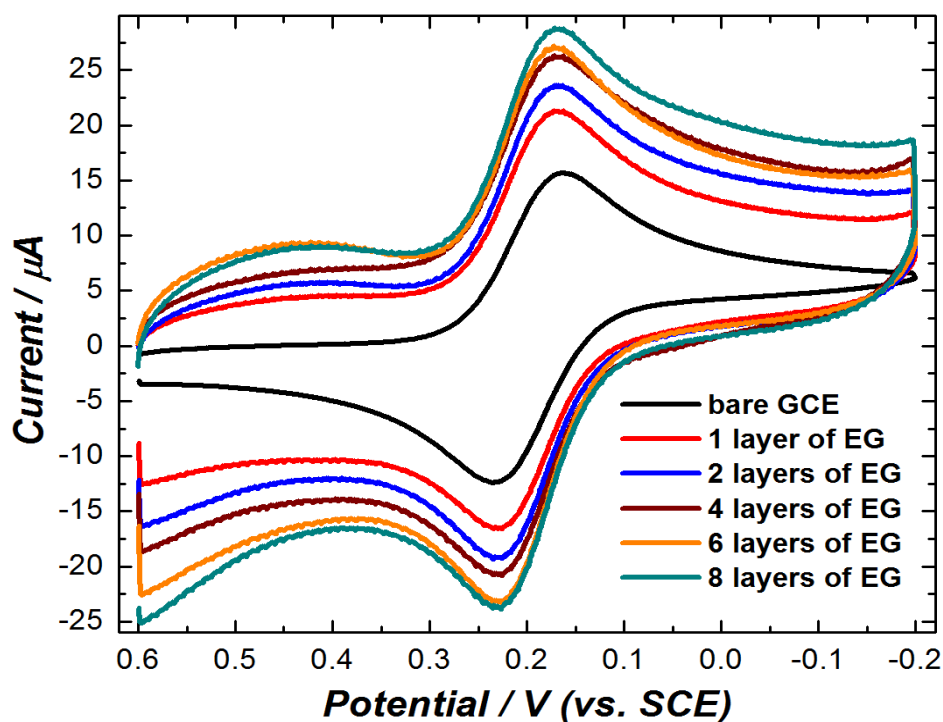

**Fig. S5** Cyclic voltammograms for bare GCE, Au NPs-EG/GCE with various layers of EG in 10 mM  $K_3Fe(CN)_6$  + 0.1 M KCl at a scan rate of  $50 \text{ mV s}^{-1}$ .

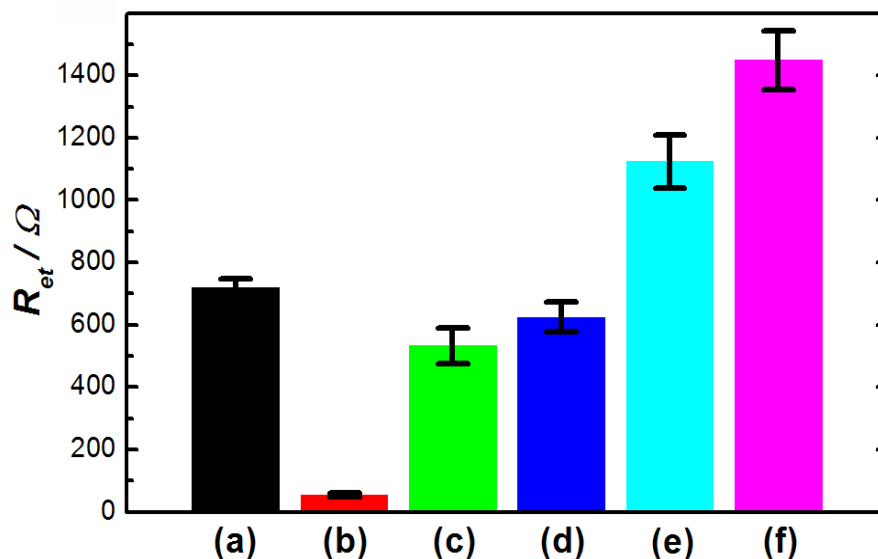

**Fig. S6** Evolution of electron transfer resistance ( $R_{et}$ ) during the stepwise cytosensor assembly process: (a) bare GCE, (b) Au NPs-EG/GCE, (c) aptamer/Au NPs-EG/GCE, (d) MCH/aptamer/Au NPs-EG/GCE, (e) cells/MCH/aptamer/Au NPs-EG/GCE, and (f) nanoprobe/cells/MCH/aptamer/Au NPs-EG/GCE. The standard deviations, which were shown as the error bars, were obtained from independent EIS measurements performed on three cytosensors.
